# Supplementary material
Source: PubMed Central journal article supplement (PMC9617757)
Supplement: NIHMS1822705-supplement-Supplemental_Data_File_1___doc___tif__pdf__etc__.pdf [file NIHMS1822705-supplement-Supplemental_Data_File_1___doc___tif__pdf__etc__.pdf]

**Table. Supplemental Digital Content 1. Characteristics of 529 Participants in the Women's Interagency HIV Study**

| <u>Characteristics</u>                                                                         | <u>529 Women</u> |
|------------------------------------------------------------------------------------------------|------------------|
| Age in number of years in 1995, mean, [Standard Deviation, SD]                                 | 36 [7.5 SD]      |
| Ethnicity, Number of subjects in each group, (%)                                               |                  |
| African American                                                                               | 322 (61%)        |
| Hispanic                                                                                       | 160 (30%)        |
| White                                                                                          | 31 (6%)          |
| Other                                                                                          | 16 (3%)          |
| HIV transmission risk, Number of subjects (%)                                                  |                  |
| Heterosexual                                                                                   | 244 (46%)        |
| Injection drug use                                                                             | 149 (28%)        |
| Transfusion                                                                                    | 13 (3%)          |
| Unknown                                                                                        | 123 (23%)        |
| Median HIV-1 RNA load at WIHS entry, (log <sub>10</sub> copies/mL) [Interquartile Range (IQR)] | 4.38 [1.09 IQR]  |
| Median CD4 cell count at WIHS entry, (cells/mm <sup>3</sup> ), [IQR]                           | 303 [289 IQR]    |

|                                                                |                 |
|----------------------------------------------------------------|-----------------|
| Median CD4/CD8 cell ratio at WIHS entry, [IQR]                 | 0.39 [0.35 IQR] |
| CCR5 $\Delta$ 32 genotype, Number of subjects (%) <sup>a</sup> |                 |
| Heterozygous                                                   | 21 (4%)         |
| Wild type                                                      | 466 (96%)       |

<sup>a</sup>487 women in this investigation had their CCR5  $\Delta$ 32 genotypes determined as part of a WIHS-wide study of  $\Delta$ 32 genotypes [27].
