# Supplementary material
Source: PubMed Central journal article supplement (PMC9617757)
Supplement: NIHMS1822705-supplement-Supplemental_Data_File_2___doc___tif__pdf__etc__.pdf [file NIHMS1822705-supplement-Supplemental_Data_File_2___doc___tif__pdf__etc__.pdf]

## Figure, Supplemental Digital Content 2.

Trajectories of CD4+ T-cell counts over time in participants stratified by HIV-1 tropism.

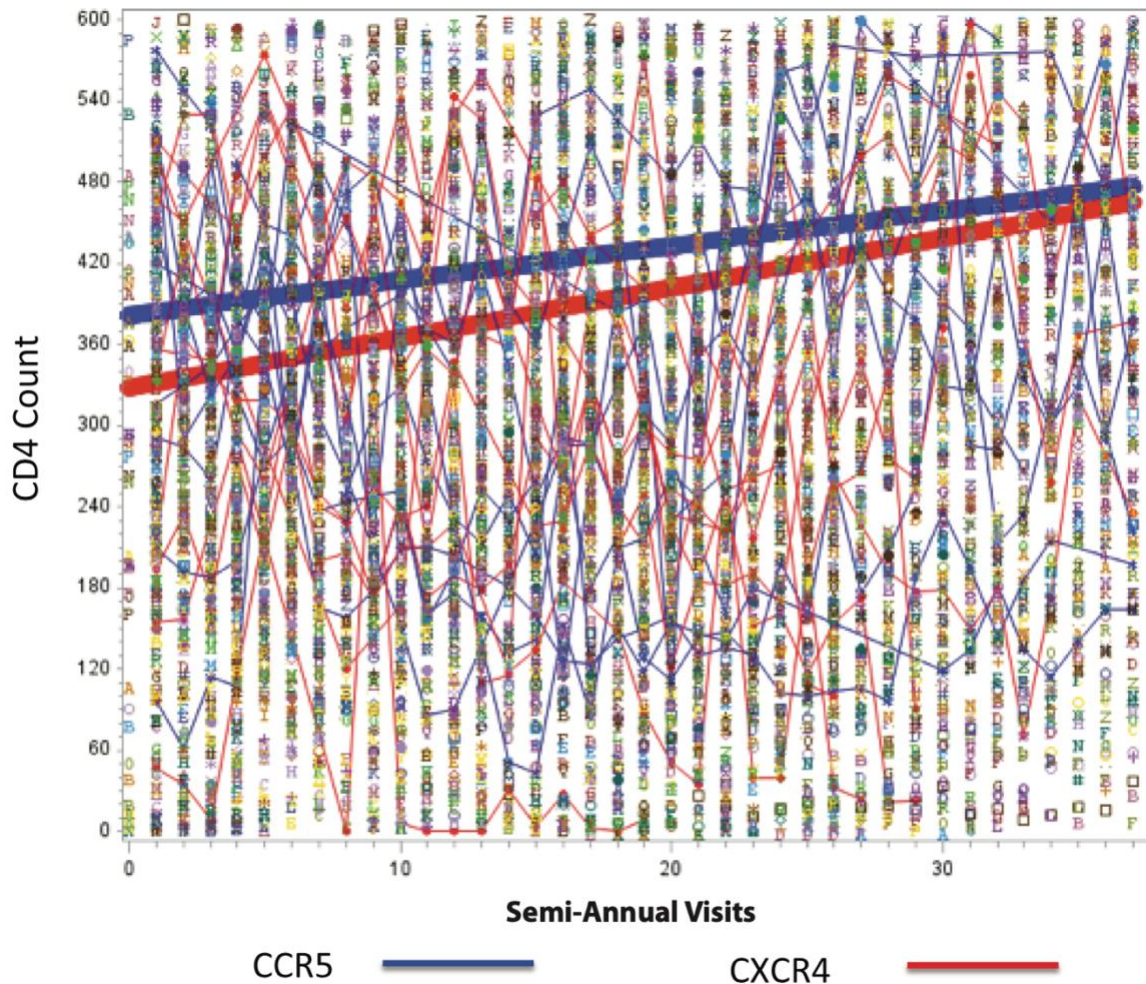

CD4 cell counts over time for the entire study population are plotted. Each dot represents the CD4 count of a particular participant that occurred at each indicated visit. Thin lines represent plots of individual, longitudinal CD4 cell count trajectories, controlling for viral load and stratified by coreceptor usage. Overall CD4 cell trajectories, controlling for viral load and stratified by coreceptor usage, are overlaid using the thick blue (CCR5) and thick red (CXCR4) lines. The overall trend was assessed using mixed effects model (SAS V9.3) ( $p=0.026$ )
