# Supplementary material
Source: PubMed Central journal article supplement (PMC9617757)
Supplement: NIHMS1822705-supplement-Supplemental_Data_File_3__doc___tif__pdf__etc__.pdf [file NIHMS1822705-supplement-Supplemental_Data_File_3__doc___tif__pdf__etc__.pdf]

**Table. Supplemental Digital Content 3. Logistic regression analysis of the relationship of AIDS mortality to cART, tropism, HIV-1 suppression and other parameters**

A. Parameter estimates of AIDS mortality

| <u>Parameter</u>                       | <u>Label</u>      | <u>Estimate</u> | <u>Standard Error</u> | <u>P-Value</u>      |
|----------------------------------------|-------------------|-----------------|-----------------------|---------------------|
| Intercept                              |                   | 1.2456          | 0.6145                | 0.0427              |
| Group                                  | Little or no cART | -0.1088         | 0.5932                | 0.8544              |
| Group                                  | Intermittent cART | 0.0573          | 0.1841                | 0.7556              |
| Group                                  | Consistent cART   | Reference       |                       |                     |
| X4                                     | X4 ever detected  | -0.0358         | 0.1141                | 0.7538              |
| <10 visits with undetectable HIV-1 RNA |                   | 0.6032          | 0.1371                | <.0001 <sup>a</sup> |
| Percentage of visits on cART           |                   | -0.0197         | 0.0123                | 0.1076              |
| Higher CD4 nadir                       |                   | -0.0867         | 0.0191                | <.0001 <sup>b</sup> |
| Maximal viral load                     |                   | 1.46E-07        | 1.58E-07              | 0.3539              |

<sup>a</sup>Participants achieving fewer than 10 visits with undetectable HIV-1 RNA have a higher likelihood of mortality due to AIDS.

<sup>b</sup>Participants with a higher CD4 nadir have a lesser likelihood of mortality due to AIDS.

## B. Odds ratio estimates of mortality due to AIDS

| <u>Effect</u>                                                        | <u>Point Estimate</u> | <u>95% Wald Confidence Limits</u> |                   |
|----------------------------------------------------------------------|-----------------------|-----------------------------------|-------------------|
| Group: Little vs Consistent cART                                     | 0.852                 | 0.096                             | 7.567             |
| Group: Intermittent vs Consistent cART                               | 1.006                 | 0.0352                            | 2.878             |
| X4 strains detected: Ever vs Never                                   | 0.931                 | 0.595                             | 1.456             |
| <sup>c</sup> <10 visits with undetectable HIV-1 RNA vs<br>≥10 visits | 3.342                 | 1.952                             | 5.72 <sup>c</sup> |
| Percentage visits on cART                                            | 0.98                  | 0.957                             | 1.004             |
| Higher CD4 nadir                                                     | 0.917                 | 0.883                             | 0.952             |
| Maximal viral load                                                   | 1                     | 1                                 | 1                 |

<sup>c</sup>Participants who achieved fewer than 10 visits with undetectable HIV-1 RNA have more than 3 times the odds of mortality due to AIDS than those who had ≥10 visits with undetectable HIV-1 RNA.
